# Supplementary material
Source: PubMed Central journal article supplement (PMC3977313)
Supplement: 1319114111_pnas.201319114SI.pdf [file 1319114111_pnas.201319114SI.pdf]

# Supporting Information

Bel et al. 10.1073/pnas.1319114111

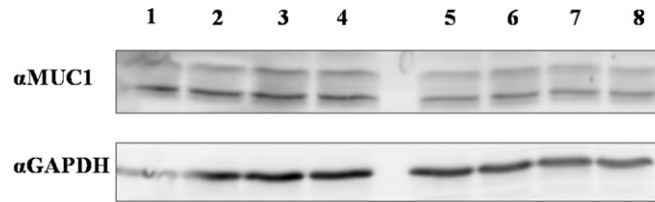

**Fig. S1.** Levels of Mucin 1 in colon of WT mice and mice lacking Tata Element Modulatory Factor (TMF<sup>-/-</sup>) mice colon. Western blot analysis of whole colon tissue from WT (lanes 1–4) and knockout (KO; lanes 5–8) mice. Samples were stained with anti-MUC1 antibody, as indicated, and with anti-GAPDH to ensure equal loading. Each lane represents a sample from a different mouse.

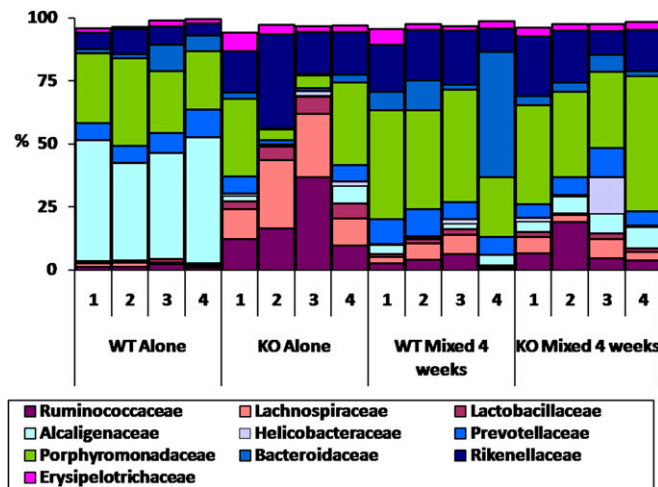

**Fig. S2.** Effects of cohousing on WT and TMF<sup>-/-</sup> mice microbiota. KO and WT mice were either housed alone or cohoused for 4 wk. Fecal samples were then collected, and microbiota composition was analyzed via 16S rRNA analysis. Taxon-based analysis at familial level among the different groups. Data are shown as percent relative abundance. Families with >1% abundance are shown. Each bar represents one mouse. Each color represents one phylum or family, as indicated at the bottom of the histograms.
